# Supplementary material for: A variant NuRD complex containing PWWP2A/B excludes MBD2/3 to regulate transcription at active genes
Source: PubMed Central journal article supplement (PMC6143588; doi:10.1038/s41467-018-06235-9), 2018-09-18
Supplement: 41467_2018_6235_MOESM3_ESM.pdf [file 41467_2018_6235_MOESM3_ESM.pdf]

## **Description of Additional Supplementary Files**

**File Name: Supplementary Data 1**

**Description:** H3K36me3 interactors.

**File Name: Supplementary Data 2**

**Description:** PWWP2A IP-MS in HeLa.

**File Name: Supplementary Data 3**

**Description:** PWWP2A IP-MS in mESC.

**File Name: Supplementary Data 4**

**Description:** PWWP2B IP-MS in mESC.

**File Name: Supplementary Data 5**

**Description:** NGS summary.

**File Name: Supplementary Data 6**

**Description:** Mass spectrometry PRIDE summary.
